# Supplementary material for: Gain and Loss Learning Differentially Contribute to Life Financial Outcomes
Source: PubMed Central journal article supplement (PMC3167846; doi:10.1371/journal.pone.0024390), 2011-09-06
Supplement: pone.0024390.s002.pdf [file pone.0024390.s002.pdf]

Table S1. Validation of gain and loss correct choices with optimal choice (correlation coefficients; \* $p < .05$ , \*\* $p < .01$ , \*\*\* $p < .001$ , two-tailed,  $N = 75$ ; related to Table 2).

|                      | <i>Gain percent choices</i> | <i>Loss percent choices</i> |
|----------------------|-----------------------------|-----------------------------|
| Gain optimal choices | 0.92***                     | 0.08                        |
| Loss optimal choices | 0.03                        | 0.71***                     |
