# Supplementary material for: Gain and Loss Learning Differentially Contribute to Life Financial Outcomes
Source: PLoS One. 2011 Sep 6;6(9):e24390. doi: 10.1371/journal.pone.0024390 (PMC3167846; doi:10.1371/journal.pone.0024390)
Supplement: Table S2 — Self-declared assets and debt correlate with distinct credit report variables. (top entry: coefficient (S.E.M.); bottom entry: t-statistic; * p<.05, ** p<.01, two-tailed; related to Figure 2). (PDF) [file pone.0024390.s003.pdf]

Table S2. Self-declared assets and debt correlate with distinct credit report variables. (top entry: coefficient (S.E.M.); bottom entry: t-statistic; \*  $p < .05$ , \*\*  $p < .01$ , two-tailed; related to Figure 2)

|                     | <i>Assets</i>                           | <i>Debts</i>                             |
|---------------------|-----------------------------------------|------------------------------------------|
| Credit amount       | 4.79 x 10 <sup>-6</sup> (0.00)<br>2.37* | 6.64 x 10 <sup>-6</sup> (0.00)<br>3.39** |
| Percent credit used | -2.12 (1.34)<br>-1.58                   | 7.18 (1.29)<br>5.56***                   |
| Constant            | 13.62 (0.78)<br>17.39***                | 2.40 (0.76)<br>3.17**                    |
| Adj. R <sup>2</sup> | .11                                     | .63                                      |
| Observations        | 37                                      | 37                                       |
